# Supplementary material for: Genetic and Pathogenicity Diversity of Aphanomyces euteiches Populations From Pea-Growing Regions in France
Source: Front Plant Sci. 2018 Nov 19;9:1673. doi: 10.3389/fpls.2018.01673 (PMC6252352; doi:10.3389/fpls.2018.01673)
Supplement: Supplementary file 1 [file Table_1.xlsx]

## Sheet: Feuil1
Additional file 2. Genotyping profiles of the 205 A. euteiches isolates obtained with the 20 SSRs
Population	Ae36	ssraph25	Ae44	Ae34	ssraph27	ssraph35	Ae17	Ae12	ssraph1	ssraph16	ssraph4	ssraph32	ssraph76	Ae54	ssraph9	ssraph50	ssraph82	ssraph20	ssraph5	Ae37
BI1	182/182	192/192	158/158	137/137	226/226	125/125	146/146	107/107	191/191	130/130	129/129	141/141	216/216	157/157	168/168	200/200	209/209	160/160	109/109	160/160
BI2	182/182	192/192	158/158	137/137	226/226	125/125	146/146	107/107	191/191	130/130	129/129	141/141	216/216	157/157	168/168	200/200	209/209	160/160	109/109	160/160
BI3	182/182	192/192	158/158	137/137	226/226	125/125	146/146	107/107	191/191	130/130	129/129	141/141	216/216	157/157	168/168	200/200	209/209	160/160	109/109	160/160
BI4	182/182	192/192	158/158	137/137	226/226	125/125	146/146	107/107	191/191	130/130	129/129	141/141	216/216	157/157	168/168	200/200	209/209	160/160	109/109	160/160
BI5	182/182	192/192	158/158	137/137	226/226	125/125	146/146	107/107	191/191	130/130	129/129	141/141	216/216	157/157	168/168	200/200	209/209	162/162	109/109	160/160
BI6	182/182	192/192	158/158	137/137	226/226	125/125	146/146	107/107	191/191	130/130	129/129	141/141	216/216	157/157	168/168	200/200	209/209	162/162	109/109	160/160
BL1	182/182	192/192	158/158	137/137	226/226	125/125	146/146	107/107	191/191	130/130	129/129	141/141	216/216	157/157	168/168	200/200	209/209	162/162	109/109	160/160
BL7	182/182	192/192	158/158	137/137	226/226	125/125	146/146	107/107	191/191	130/130	129/129	141/141	216/216	157/157	168/168	200/200	209/209	162/162	109/109	160/160
BL8	182/182	192/192	158/158	137/137	226/226	125/125	146/146	107/107	191/191	130/130	129/129	141/141	216/216	157/157	168/168	200/200	209/209	162/162	109/109	160/160
BL9	182/182	192/192	158/158	137/137	226/226	125/125	146/146	107/107	191/191	130/130	129/129	141/141	216/216	157/157	168/168	200/200	209/209	162/162	109/109	160/160
BL4	182/182	192/192	158/158	137/137	226/226	125/125	146/146	107/107	191/191	130/130	129/129	141/141	216/216	157/157	168/168	200/200	209/209	162/162	109/109	160/160
BL5	182/182	192/192	158/158	137/137	226/226	125/125	146/146	107/107	191/191	130/130	129/129	141/141	216/216	157/157	168/168	200/200	209/209	162/162	109/109	160/160
BL6	182/182	192/192	158/158	137/137	226/226	125/125	146/146	107/107	191/191	130/130	129/129	141/141	216/216	157/157	168/168	200/200	209/209	162/162	109/109	160/160
BL12	182/182	192/192	158/158	137/137	226/226	125/125	146/146	107/107	191/191	130/130	129/129	141/141	216/216	157/157	168/168	200/200	209/209	162/162	109/109	160/160
BL13	182/182	192/192	158/158	137/137	226/226	125/125	146/146	107/107	191/191	130/130	129/129	141/141	216/216	157/157	168/168	200/200	209/209	162/162	109/109	160/160
BL10	182/182	192/192	158/158	137/137	226/226	125/125	146/146	107/107	193/193	130/130	129/129	141/141	216/216	157/157	168/168	200/200	209/209	162/162	109/109	160/160
BL11	182/182	192/192	158/158	137/137	226/226	125/125	146/146	107/107	193/193	130/130	129/129	141/141	216/216	157/157	168/168	200/200	209/209	162/162	109/109	160/160
BL2	182/182	192/192	158/158	137/137	226/226	125/125	146/146	107/107	193/193	130/130	129/129	141/141	216/216	157/157	168/168	200/200	209/209	162/162	109/109	160/160
BL3	182/182	192/192	158/158	137/137	226/226	125/125	146/146	107/107	193/193	130/130	129/129	141/141	216/216	157/157	168/168	200/200	209/209	162/162	109/109	160/160
BO1	182/182	192/192	158/158	137/137	226/226	125/125	146/146	107/107	193/193	130/130	129/129	141/141	216/216	157/157	168/168	200/200	209/209	162/162	109/109	160/160
BO8	182/182	192/192	158/158	137/137	226/226	125/125	146/146	107/107	193/193	130/130	129/129	141/141	216/216	157/157	168/168	200/200	209/209	162/162	109/109	160/160
BO9	182/182	192/192	158/158	137/137	226/226	125/125	146/146	107/107	193/193	130/130	129/129	141/141	216/216	157/157	168/168	200/200	209/209	162/162	109/109	160/160
BO10	182/182	192/192	158/158	137/137	226/226	125/125	146/146	107/107	193/193	130/130	129/129	141/141	216/216	157/157	168/168	200/200	209/209	162/162	109/109	160/160
BO11	182/182	192/192	158/158	137/137	226/226	125/125	146/146	107/107	193/193	130/130	129/129	141/141	216/216	157/157	168/168	200/200	209/209	162/162	109/109	160/160
BO2	182/182	192/192	158/158	137/137	226/226	125/125	146/146	107/107	193/193	130/130	129/129	141/141	216/216	157/157	168/168	200/200	209/209	162/162	109/109	160/160
BO3	182/182	192/192	158/158	137/137	226/226	125/125	146/146	107/107	193/193	130/130	129/129	141/141	216/216	157/157	168/168	200/200	209/209	162/162	109/109	160/160
BO4	182/182	192/192	158/158	137/137	226/226	125/125	146/146	107/107	193/193	130/130	129/129	141/141	216/216	157/157	168/168	200/200	209/209	162/162	109/109	160/160
BO5	182/182	192/192	158/158	137/137	226/226	125/125	146/146	107/107	193/193	130/130	129/129	141/141	216/216	157/157	168/168	200/200	209/209	162/162	109/109	160/160
BO6	182/182	192/192	158/158	137/137	226/226	125/125	146/146	107/107	193/193	130/130	129/129	141/141	216/216	157/157	168/168	200/200	209/209	162/162	109/109	160/160
BO7	182/182	192/192	158/158	137/137	226/226	125/125	146/146	107/107	193/193	130/130	129/129	141/141	216/216	157/157	168/168	200/200	209/209	162/162	109/109	160/160
BRO_1	182/182	192/192	158/158	137/137	226/226	125/125	146/146	107/107	191/191	130/130	129/129	141/141	216/216	157/157	168/168	200/200	209/209	162/162	109/109	160/160
BRO_8	182/182	192/192	158/158	137/137	226/226	125/125	146/146	107/107	191/191	130/130	129/129	141/141	216/216	157/157	168/168	200/200	209/209	162/162	109/109	160/160
BRO_2	182/182	192/192	158/158	137/137	226/226	125/125	146/146	107/107	191/191	130/130	129/129	141/141	216/216	157/157	168/168	200/200	209/209	162/162	109/109	160/160
BRO_3	182/182	192/192	158/158	137/137	226/226	125/125	146/146	107/107	191/191	130/130	129/129	141/141	216/216	157/157	168/168	200/200	209/209	162/162	109/109	160/160
BRO_4	182/182	192/192	158/158	137/137	226/226	125/125	146/146	107/107	191/191	130/130	129/129	141/141	216/216	157/157	168/168	200/200	209/209	162/162	109/109	160/160
BRO_5	182/182	192/192	158/158	137/137	226/226	125/125	146/146	107/107	191/191	130/130	129/129	141/141	216/216	157/157	168/168	200/200	209/209	162/162	109/109	160/160
BRO_6	182/182	192/192	158/158	137/137	226/226	125/125	146/146	107/107	191/191	130/130	129/129	141/141	216/216	157/157	168/168	200/200	209/209	162/162	109/109	160/160
BRO_7	182/182	192/192	158/158	137/137	226/226	125/125	146/146	107/107	191/191	130/130	129/129	141/141	216/216	157/157	168/168	200/200	209/209	162/162	109/109	160/160
BR1_11	182/182	192/192	158/158	137/137	226/226	125/125	146/146	107/107	191/191	130/130	129/129	141/141	216/216	157/157	168/168	200/200	209/209	162/162	109/109	160/160
BR1_12	182/182	192/192	158/158	137/137	226/226	125/125	146/146	107/107	191/191	130/130	129/129	141/141	216/216	157/157	168/168	200/200	209/209	162/162	109/109	160/160
BR1_13	182/182	192/192	158/158	137/137	226/226	125/125	146/146	107/107	191/191	130/130	129/129	141/141	216/216	157/157	168/168	200/200	209/209	162/162	109/109	160/160
BR1_14	182/182	192/192	158/158	137/137	226/226	125/125	146/146	107/107	191/191	130/130	129/129	141/141	216/216	157/157	168/168	200/200	209/209	162/162	109/109	160/160
BR1_16	182/182	192/192	158/158	137/137	226/226	125/125	146/146	107/107	191/191	130/130	129/129	141/141	216/216	157/157	168/168	200/200	209/209	162/162	109/109	160/160
BR1_5	182/182	192/192	158/158	137/137	226/226	125/125	146/146	107/107	191/191	130/130	129/129	141/141	216/216	157/157	168/168	200/200	209/209	162/162	109/109	160/160
BR1_6	182/182	192/192	158/158	137/137	226/226	125/125	146/146	107/107	191/191	130/130	129/129	141/141	216/216	157/157	168/168	200/200	209/209	162/162	109/109	160/160
BR1_7	182/182	192/192	158/158	137/137	226/226	125/125	146/146	107/107	191/191	130/130	129/129	141/141	216/216	157/157	168/168	200/200	209/209	162/162	109/109	160/160
BR1_8	182/182	192/192	158/158	137/137	226/226	125/125	146/146	107/107	191/191	130/130	129/129	141/141	216/216	157/157	168/168	200/200	209/209	162/162	109/109	160/160
BR1-15	182/182	192/192	158/158	137/137	226/226	125/125	146/146	107/107	191/191	130/130	129/129	141/141	216/216	157/157	164/182	200/200	209/209	162/162	109/109	160/160
BR1-2	182/182	192/192	158/158	140/140	226/230	122/125	139/146	101/107	191/193	130/132	129/136	137/141	213/216	157/161	168/168	200/202	207/209	160/160	103/109	154/160
BR1-3	182/182	192/192	158/158	140/140	226/230	122/125	139/146	101/107	191/193	130/132	129/136	137/141	213/216	157/161	164/182	200/202	207/209	160/160	103/109	154/160
BR1-1	182/182	192/192	158/158	140/140	226/230	122/125	139/146	101/107	191/193	130/132	129/136	137/141	213/216	157/161	164/182	200/202	207/209	160/160	103/109	154/160
BR1-9	182/182	192/192	158/158	140/140	226/230	122/125	139/146	101/107	187/191	130/132	129/136	137/141	213/216	157/161	168/182	200/202	207/209	160/162	103/109	154/160
BR1-10	182/182	192/192	158/158	140/140	226/230	122/125	139/146	107/107	187/191	130/132	129/136	137/141	213/216	157/161	168/182	200/202	207/209	160/162	103/109	154/160
BR1-4	182/182	192/192	158/158	140/140	226/230	122/125	139/146	107/107	191/193	130/132	129/136	137/141	216/216	157/157	168/182	200/202	209/209	160/160	103/109	154/160
BR2_1	182/182	192/192	158/158	137/137	226/226	125/125	146/146	107/107	191/191	130/130	129/129	141/141	216/216	157/157	168/168	200/200	209/209	162/162	109/109	160/160
BR2_2	182/182	192/192	158/158	137/137	226/226	125/125	146/146	107/107	191/191	130/130	129/129	141/141	216/216	157/157	168/168	200/200	209/209	162/162	109/109	160/160
BR2_3	182/182	192/192	158/158	137/137	226/226	125/125	146/146	107/107	191/191	130/130	129/129	141/141	216/216	157/157	168/168	200/200	209/209	162/162	109/109	160/160
BR2_4	182/182	192/192	158/158	137/137	226/226	125/125	146/146	107/107	191/191	130/130	129/129	141/141	216/216	157/157	168/168	200/200	209/209	162/162	109/109	160/160
BR3-1	182/182	192/192	158/158	140/140	226/230	122/125	139/146	101/107	191/193	130/132	129/136	137/141	213/216	157/161	164/182	200/202	207/209	160/160	103/109	154/160
BR3-2	182/182	192/192	158/158	140/140	226/230	122/125	139/146	101/107	191/193	130/132	129/136	137/141	213/216	157/161	164/182	200/202	207/209	160/160	103/109	154/160
BR3-3	182/182	192/192	158/158	140/140	226/230	122/125	139/146	101/107	191/193	130/132	129/136	137/141	213/216	157/161	168/182	200/202	207/209	160/162	103/109	154/160
BR3-4	182/182	192/192	158/158	140/140	226/230	122/125	139/146	101/107	191/193	130/132	129/136	137/141	213/216	157/161	168/182	200/202	207/209	160/162	103/109	154/160
BR3-5	182/182	192/192	158/158	140/140	226/230	122/125	139/146	101/107	191/193	130/132	129/136	137/141	213/216	157/161	168/182	200/202	207/209	160/162	103/109	154/160
BR3-6	182/182	192/192	158/158	140/140	226/230	122/125	139/146	101/107	191/193	130/132	129/136	137/141	213/216	157/161	168/182	200/202	207/209	160/162	103/109	154/160
BR3-7	182/182	192/192	158/158	140/140	226/230	122/125	139/146	101/107	191/193	130/132	129/136	137/141	213/216	157/161	168/182	200/202	207/209	160/162	103/109	154/160
BR3-8	182/182	192/192	158/158	140/140	226/230	122/125	139/146	101/107	191/193	130/132	129/136	137/141	213/216	157/161	168/182	200/202	207/209	160/162	103/109	154/160
CR1	182/182	192/192	158/158	137/137	226/226	125/125	146/146	107/107	191/191	130/130	129/129	141/141	216/216	157/157	168/168	200/200	209/209	162/162	109/109	160/160
CR8	182/182	192/192	158/158	137/137	226/226	125/125	146/146	107/107	191/191	130/130	129/129	141/141	216/216	157/157	168/168	200/200	209/209	162/162	109/109	160/160
CR9	182/182	192/192	158/158	137/137	226/226	125/125	146/146	107/107	191/191	130/130	129/129	141/141	216/216	157/157	168/168	200/200	209/209	162/162	109/109	160/160
CR10	182/182	192/192	158/158	137/137	226/226	125/125	146/146	107/107	191/191	130/130	129/129	141/141	216/216	157/157	168/168	200/200	209/209	162/162	109/109	160/160
CR2	182/182	192/192	158/158	137/137	226/226	125/125	146/146	107/107	191/191	130/130	129/129	141/141	216/216	157/157	168/168	200/200	209/209	162/162	109/109	160/160
CR3	182/182	192/192	158/158	137/137	226/226	125/125	146/146	107/107	191/191	130/130	129/129	141/141	216/216	157/157	168/168	200/200	209/209	162/162	109/109	160/160
CR4	182/182	192/192	158/158	137/137	226/226	125/125	146/146	107/107	191/191	130/130	129/129	141/141	216/216	157/157	168/168	200/200	209/209	162/162	109/109	160/160
CR5	182/182	192/192	158/158	137/137	226/226	125/125	146/146	107/107	191/191	130/130	129/129	141/141	216/216	157/157	168/168	200/200	209/209	162/162	109/109	160/160
CR6	182/182	192/192	158/158	137/137	226/226	125/125	146/146	107/107	191/191	130/130	129/129	141/141	216/216	157/157	168/168	200/200	209/209	162/162	109/109	160/160
CR7	182/182	192/192	158/158	137/137	226/226	125/125	146/146	107/107	191/191	130/130	129/129	141/141	216/216	157/157	168/168	200/200	209/209	162/162	109/109	160/160
CR11	182/182	192/192	158/158	137/137	226/226	125/125	146/146	113/113	191/191	130/130	129/129	141/141	216/216	157/157	168/168	200/200	209/209	162/162	109/109	160/160
CR12	182/182	192/192	158/158	137/137	226/226	125/125	146/146	113/113	191/191	130/130	129/129	141/141	216/216	157/157	168/168	200/200	209/209	162/162	109/109	160/160
CR13	182/182	192/192	158/158	137/137	226/226	125/125	146/146	113/113	191/191	130/130	129/129	141/141	216/216	157/157	168/168	200/200	209/209	162/162	109/109	160/160
ENO_1	182/182	192/192	158/158	137/137	226/226	125/125	146/146	107/107	191/191	130/130	129/129	141/141	216/216	157/157	168/168	200/200	209/209	160/160	109/109	160/160
ENO_10	182/182	192/192	158/158	137/137	226/226	125/125	146/146	107/107	191/191	130/130	129/129	141/141	216/216	157/157	168/168	200/200	209/209	160/160	109/109	160/160
ENO_11	182/182	192/192	158/158	137/137	226/226	125/125	146/146	107/107	191/191	130/130	129/129	141/141	216/216	157/157	168/168	200/200	209/209	160/160	109/109	160/160
ENO_12	182/182	192/192	158/158	137/137	226/226	125/125	146/146	107/107	191/191	130/130	129/129	141/141	216/216	157/157	168/168	200/200	209/209	160/160	109/109	160/160
ENO_13	182/182	192/192	158/158	137/137	226/226	125/125	146/146	107/107	191/191	130/130	129/129	141/141	216/216	157/157	168/168	200/200	209/209	160/160	109/109	160/160
ENO_14	182/182	192/192	158/158	137/137	226/226	125/125	146/146	107/107	191/191	130/130	129/129	141/141	216/216	157/157	168/168	200/200	209/209	160/160	109/109	160/160
ENO_2	182/182	192/192	158/158	137/137	226/226	125/125	146/146	107/107	191/191	130/130	129/129	141/141	216/216	157/157	168/168	200/200	209/209	160/160	109/109	160/160
ENO_17	182/182	192/192	158/158	137/137	226/226	125/125	146/146	107/107	191/191	130/130	129/129	141/141	216/216	157/157	168/168	200/200	209/209	160/160	109/109	160/160
ENO_3	182/182	192/192	158/158	137/137	226/226	125/125	146/146	107/107	191/191	130/130	129/129	141/141	216/216	157/157	168/168	200/200	209/209	160/160	109/109	160/160
ENO_4	182/182	192/192	158/158	137/137	226/226	125/125	146/146	107/107	191/191	130/130	129/129	141/141	216/216	157/157	168/168	200/200	209/209	160/160	109/109	160/160
EN0-5	182/182	192/192	158/158	137/137	226/226	125/125	146/146	107/107	193/193	130/130	129/129	141/141	216/216	157/157	168/168	200/200	209/209	162/162	109/109	160/160
EN0-6	182/182	192/192	158/158	137/137	226/226	125/125	146/146	107/107	193/193	130/130	129/129	141/141	216/216	157/157	168/168	200/200	209/209	162/162	109/109	160/160
EN0-7	182/182	192/192	158/158	137/137	226/226	125/125	146/146	107/107	193/193	130/130	129/129	141/141	216/216	157/157	168/168	200/200	209/209	162/162	109/109	160/160
EN0-8	182/182	192/192	158/158	137/137	226/226	125/125	146/146	107/107	193/193	130/130	129/129	141/141	216/216	157/157	168/168	200/200	209/209	162/162	109/109	160/160
EN0-9	182/182	192/192	158/158	137/137	226/226	125/125	146/146	107/107	193/193	130/130	129/129	141/141	216/216	157/157	168/168	200/200	209/209	162/162	109/109	160/160
EN0-15	182/182	192/192	158/158	137/137	226/226	125/125	146/146	107/107	193/193	130/130	129/129	141/141	216/216	157/157	168/168	200/200	209/209	162/162	109/109	160/160
EN0-18	182/182	192/192	158/158	137/137	226/226	125/125	146/146	107/107	193/193	130/130	129/129	141/141	216/216	157/157	168/168	200/200	209/209	162/162	109/109	160/160
EN0-19	182/182	192/192	158/158	137/137	226/226	125/125	146/146	107/107	193/193	130/130	129/129	141/141	216/216	157/157	168/168	200/200	209/209	162/162	109/109	160/160
EN0-21	182/182	192/192	158/158	137/137	226/226	125/125	146/146	107/107	193/193	130/130	129/129	141/141	216/216	157/157	168/168	200/200	209/209	162/162	109/109	160/160
EN0-16	182/182	192/192	158/158	137/137	226/226	125/125	146/146	107/107	191/193	130/130	129/129	141/141	216/216	157/157	168/168	200/200	209/209	160/162	109/109	160/160
EN0-20	182/182	192/192	158/158	137/137	226/226	125/125	146/146	113/113	191/191	130/130	129/129	141/141	216/216	157/157	168/168	200/200	209/209	162/162	109/109	160/160
EN1_8	182/182	192/192	158/158	137/137	226/226	125/125	146/146	107/107	191/191	130/130	129/129	141/141	216/216	157/157	168/168	200/200	209/209	160/160	109/109	160/160
EN1-5	182/182	192/192	158/158	137/137	226/226	125/125	146/146	107/107	191/191	130/130	129/129	141/141	216/216	157/157	168/168	200/200	209/209	162/162	109/109	160/160
EN1-6	182/182	192/192	158/158	137/137	226/226	125/125	146/146	107/107	191/191	130/130	129/129	141/141	216/216	157/157	168/168	200/200	209/209	162/162	109/109	160/160
EN1-7	182/182	192/192	158/158	137/137	226/226	125/125	146/146	107/107	191/191	130/130	129/129	141/141	216/216	157/157	168/168	200/200	209/209	162/162	109/109	160/160
EN1-2	182/182	192/192	158/158	137/137	226/226	125/125	146/146	107/107	191/191	130/130	129/129	141/141	216/216	157/157	168/168	200/200	209/209	162/162	109/109	160/160
EN1-1	182/182	192/192	158/158	137/137	226/226	125/125	146/146	107/107	193/193	130/130	129/129	141/141	216/216	157/157	168/168	200/200	209/209	162/162	109/109	160/160
EN1-3	182/182	192/192	158/158	137/137	226/226	125/125	146/146	107/107	193/193	130/130	129/129	141/141	216/216	157/157	168/168	200/200	209/209	162/162	109/109	160/160
EN1-4	182/182	192/192	158/158	137/137	226/226	125/125	146/146	107/107	193/193	130/130	129/129	141/141	216/216	157/157	168/168	200/200	209/209	162/162	109/109	160/160
FE3	182/182	192/192	158/158	137/137	226/226	125/125	146/146	107/107	193/193	130/130	129/129	141/141	216/216	157/157	168/168	200/200	209/209	160/160	109/109	160/160
FE4	182/182	192/192	158/158	137/137	226/226	125/125	146/146	107/107	193/193	130/130	129/129	141/141	216/216	157/157	168/168	200/200	209/209	160/160	109/109	160/160
FE5	182/182	192/192	158/158	137/137	226/226	125/125	146/146	107/107	193/193	130/130	129/129	141/141	216/216	157/157	168/168	200/200	209/209	160/160	109/109	160/160
FE6	182/182	192/192	158/158	137/137	226/226	125/125	146/146	107/107	193/193	130/130	129/129	141/141	216/216	157/157	168/168	200/200	209/209	160/160	109/109	160/160
FE7	182/182	192/192	158/158	137/137	226/226	125/125	146/146	107/107	193/193	130/130	129/129	141/141	216/216	157/157	168/168	200/200	209/209	160/160	109/109	160/160
FE8	182/182	192/192	158/158	137/137	226/226	125/125	146/146	107/107	193/193	130/130	129/129	141/141	216/216	157/157	168/168	200/200	209/209	160/160	109/109	160/160
FE9	182/182	192/192	158/158	137/137	226/226	125/125	146/146	107/107	193/193	130/130	129/129	141/141	216/216	157/157	168/168	200/200	209/209	160/160	109/109	160/160
FE10	182/182	192/192	158/158	137/137	226/226	125/125	146/146	107/107	193/193	130/130	129/129	141/141	216/216	157/157	168/168	200/200	209/209	160/160	109/109	160/160
FE11	182/182	192/192	158/158	137/137	226/226	125/125	146/146	107/107	193/193	130/130	129/129	141/141	216/216	157/157	168/168	200/200	209/209	160/160	109/109	160/160
FE12	182/182	192/192	158/158	137/137	226/226	125/125	146/146	107/107	193/193	130/130	129/129	141/141	216/216	157/157	168/168	200/200	209/209	160/160	109/109	160/160
FE1	182/182	192/192	158/158	137/137	226/226	125/125	146/146	107/107	193/193	130/130	129/129	141/141	216/216	157/157	168/168	200/200	209/209	160/160	109/109	160/160
FE2	182/182	192/192	158/158	137/137	226/226	125/125	146/146	107/107	193/193	130/130	129/129	141/141	216/216	157/157	168/168	200/200	209/209	160/160	109/109	160/160
HBO_1	182/182	192/192	158/158	137/137	226/226	125/125	146/146	107/107	191/191	130/130	129/129	141/141	216/216	157/157	168/168	200/200	209/209	162/162	109/109	160/160
HBO_6	182/182	192/192	158/158	137/137	226/226	125/125	146/146	107/107	191/191	130/130	129/129	141/141	216/216	157/157	168/168	200/200	209/209	162/162	109/109	160/160
HBO_2	182/182	192/192	158/158	137/137	226/226	125/125	146/146	107/107	191/191	130/130	129/129	141/141	216/216	157/157	168/168	200/200	209/209	162/162	109/109	160/160
HB0-3	182/182	192/192	158/158	137/137	226/226	125/125	146/146	107/107	191/191	130/130	129/129	141/141	216/216	157/157	168/168	200/200	209/209	162/162	109/109	160/160
HB0-4	182/182	192/192	158/158	137/137	226/226	125/125	146/146	107/107	191/191	130/130	129/129	141/141	216/216	157/157	168/168	200/200	209/209	162/162	109/109	160/160
HB0-5	182/182	192/192	158/158	137/137	226/226	125/125	146/146	107/107	191/191	130/130	129/129	141/141	216/216	157/157	168/168	200/200	209/209	162/162	109/109	160/160
HB0-7	182/182	192/192	158/158	137/137	226/226	125/125	146/146	107/107	191/191	130/130	129/129	141/141	216/216	157/157	168/168	200/200	209/209	162/162	109/109	160/160
HB0-8	182/182	192/192	158/158	137/137	226/226	125/125	146/146	107/107	191/191	130/130	129/129	141/141	216/216	157/157	168/168	200/200	209/209	162/162	109/109	160/160
HB0-9	182/182	192/192	158/158	137/137	226/226	125/125	146/146	107/107	191/191	130/130	129/129	141/141	216/216	157/157	168/168	200/200	209/209	162/162	109/109	160/160
HB0-10	182/182	192/192	158/158	137/137	226/226	125/125	146/146	107/107	191/191	130/130	129/129	141/141	216/216	157/157	168/168	200/200	209/209	162/162	109/109	160/160
HB0-11	182/182	192/192	158/158	137/137	226/226	125/125	146/146	107/107	191/191	130/130	129/129	141/141	216/216	157/157	168/168	200/200	209/209	162/162	109/109	160/160
HB0-12	182/182	192/192	158/158	137/137	226/226	125/125	146/146	107/107	191/191	130/130	129/129	141/141	216/216	157/157	168/168	200/200	209/209	162/162	109/109	160/160
HB1-1	182/182	192/192	158/158	137/137	226/226	125/125	146/146	107/107	191/191	130/130	129/129	141/141	216/216	157/157	168/168	200/200	209/209	162/162	109/109	160/160
HB1-5	182/182	192/192	158/158	137/137	226/226	125/125	146/146	107/107	191/191	130/130	129/129	141/141	216/216	157/157	168/168	200/200	209/209	162/162	109/109	160/160
HB1-6	182/182	192/192	158/158	137/137	226/226	125/125	146/146	107/107	191/191	130/130	129/129	141/141	216/216	157/157	168/168	200/200	209/209	162/162	109/109	160/160
HB1-7	182/182	192/192	158/158	137/137	226/226	125/125	146/146	107/107	191/191	130/130	129/129	141/141	216/216	157/157	168/168	200/200	209/209	162/162	109/109	160/160
HB1-8	182/182	192/192	158/158	137/137	226/226	125/125	146/146	107/107	191/191	130/130	129/129	141/141	216/216	157/157	168/168	200/200	209/209	162/162	109/109	160/160
HB1-9	182/182	192/192	158/158	137/137	226/226	125/125	146/146	107/107	191/191	130/130	129/129	141/141	216/216	157/157	168/168	200/200	209/209	162/162	109/109	160/160
HB1-10	182/182	192/192	158/158	137/137	226/226	125/125	146/146	107/107	191/191	130/130	129/129	141/141	216/216	157/157	168/168	200/200	209/209	162/162	109/109	160/160
HB1-11	182/182	192/192	158/158	137/137	226/226	125/125	146/146	107/107	191/191	130/130	129/129	141/141	216/216	157/157	168/168	200/200	209/209	162/162	109/109	160/160
HB1-14	182/182	192/192	158/158	137/137	226/226	125/125	146/146	107/107	191/191	130/130	129/129	141/141	216/216	157/157	168/168	200/200	209/209	162/162	109/109	160/160
HB1-15	182/182	192/192	158/158	137/137	226/226	125/125	146/146	107/107	191/191	130/130	129/129	141/141	216/216	157/157	168/168	200/200	209/209	162/162	109/109	160/160
HB1-16	182/182	192/192	158/158	137/137	226/226	125/125	146/146	107/107	191/191	130/130	129/129	141/141	216/216	157/157	168/168	200/200	209/209	162/162	109/109	160/160
HB1-3	182/182	192/192	158/158	137/137	226/226	125/125	146/146	107/107	191/191	130/130	129/129	141/141	216/216	157/157	168/168	200/200	209/209	162/162	109/109	160/160
HB1-18	182/182	192/192	158/158	137/137	226/226	125/125	146/146	107/107	191/191	130/130	129/129	141/141	216/216	157/157	168/168	200/200	209/209	162/162	109/109	160/160
HB1-21	182/182	192/192	158/158	137/137	226/226	125/125	146/146	107/107	191/191	130/130	129/129	141/141	216/216	157/157	168/168	200/200	209/209	162/162	109/109	160/160
HB1-22	182/182	192/192	158/158	137/137	226/226	125/125	146/146	107/107	191/191	130/130	129/129	141/141	216/216	157/157	168/168	200/200	209/209	162/162	109/109	160/160
HB1-4	182/182	192/192	158/158	137/137	226/226	125/125	146/146	107/107	191/191	130/130	129/129	141/141	216/216	157/157	168/168	200/200	209/209	162/162	109/109	160/160
HB1-13	182/182	192/192	158/158	137/137	226/226	125/125	146/146	113/113	193/193	130/130	129/129	141/141	216/216	157/157	168/168	200/200	209/209	160/160	109/109	160/160
HB1-12	182/182	192/192	158/158	137/137	226/226	125/125	146/146	113/113	193/193	130/130	129/129	141/141	216/216	157/157	168/168	200/200	209/209	160/160	109/109	160/160
HB1-17	182/182	192/192	158/158	137/137	226/226	125/125	146/146	113/113	193/193	130/130	129/129	141/141	216/216	157/157	168/168	200/200	209/209	160/160	109/109	160/160
HB1-19	182/182	192/192	158/158	137/137	226/226	125/125	146/146	113/113	193/193	130/130	129/129	141/141	216/216	157/157	168/168	200/200	209/209	160/160	109/109	160/160
HB1-2	182/182	192/192	158/158	137/137	226/226	125/125	146/146	107/107	191/191	130/130	129/129	130141	216/216	157/157	168/168	200/200	209/209	162/162	109/109	160/160
HB1-20	182/182	192/192	158/158	137/137	226/226	125/125	146/146	107/107	191/191	130/130	129/129	130141	216/216	157/157	168/168	200/200	209/209	162/162	109/109	160/160
M01	182/182	192/192	158/158	137/137	226/226	125/125	146/146	107/107	193/193	130/130	129/129	141/141	216/216	157/157	168/168	200/200	209/209	160/160	106/106	157/157
MO2	182/182	192/192	158/158	137/137	226/226	125/125	146/146	107/107	193/193	130/130	129/129	141/141	216/216	157/157	168/168	200/200	209/209	160/160	106/106	157/157
MO5	182/182	192/192	158/158	137/137	226/226	125/125	146/146	107/107	193/193	130/130	129/129	141/141	216/216	157/157	168/168	200/200	209/209	160/160	106/106	157/157
MO6	182/182	192/192	158/158	137/137	226/226	125/125	146/146	107/107	193/193	130/130	129/129	141/141	216/216	157/157	168/168	200/200	209/209	160/160	106/106	157/157
MO7	182/182	192/192	158/158	137/137	226/226	125/125	146/146	107/107	193/193	130/130	129/129	141/141	216/216	157/157	168/168	200/200	209/209	160/160	106/106	157/157
MO9	182/182	192/192	158/158	137/137	226/226	125/125	146/146	107/107	193/193	130/130	129/129	141/141	216/216	157/157	168/168	200/200	209/209	160/160	106/106	157/157
MO1	182/182	192/192	158/158	137/137	226/226	125/125	146/146	107/107	191/191	130/130	129/129	141/141	216/216	157/157	168/168	200/200	209/209	162/162	109/109	160/160
MO3	182/182	192/192	158/158	137/137	226/226	125/125	146/146	107/107	191/191	130/130	129/129	141/141	216/216	157/157	168/168	200/200	209/209	162/162	109/109	160/160
MO4	182/182	192/192	158/158	137/137	226/226	125/125	146/146	107/107	191/191	130/130	129/129	141/141	216/216	157/157	168/168	200/200	209/209	162/162	109/109	160/160
NR1	182/182	192/192	158/158	137/137	226/226	125/125	146/146	107/107	191/191	130/130	129/129	141/141	216/216	157/157	168/168	200/200	209/209	160/160	109/109	160/160
NR2	182/182	192/192	158/158	137/137	226/226	125/125	146/146	107/107	191/191	130/130	129/129	141/141	216/216	157/157	168/168	200/200	209/209	160/160	109/109	160/160
NR3	182/182	192/192	158/158	137/137	226/226	125/125	146/146	107/107	191/191	130/130	129/129	141/141	216/216	157/157	168/168	200/200	209/209	160/160	109/109	160/160
NR4	182/182	192/192	158/158	137/137	226/226	125/125	146/146	107/107	191/191	130/130	129/129	141/141	216/216	157/157	168/168	200/200	209/209	160/160	109/109	160/160
NR8	182/182	192/192	158/158	137/137	226/226	125/125	146/146	107/107	191/191	130/130	129/129	141/141	216/216	157/157	168/168	200/200	209/209	162/162	109/109	160/160
NR9	182/182	192/192	158/158	137/137	226/226	125/125	146/146	107/107	191/191	130/130	129/129	141/141	216/216	157/157	168/168	200/200	209/209	162/162	109/109	160/160
NR10	182/182	192/192	158/158	137/137	226/226	125/125	146/146	107/107	191/191	130/130	129/129	141/141	216/216	157/157	168/168	200/200	209/209	162/162	109/109	160/160
NR11	182/182	192/192	158/158	137/137	226/226	125/125	146/146	107/107	191/191	130/130	129/129	141/141	216/216	157/157	168/168	200/200	209/209	162/162	109/109	160/160
NR12	182/182	192/192	158/158	137/137	226/226	125/125	146/146	107/107	191/191	130/130	129/129	141/141	216/216	157/157	168/168	200/200	209/209	162/162	109/109	160/160
NR13	182/182	192/192	158/158	137/137	226/226	125/125	146/146	107/107	191/191	130/130	129/129	141/141	216/216	157/157	168/168	200/200	209/209	162/162	109/109	160/160
NR14	182/182	192/192	158/158	137/137	226/226	125/125	146/146	107/107	191/191	130/130	129/129	141/141	216/216	157/157	168/168	200/200	209/209	162/162	109/109	160/160
NR15	182/182	192/192	158/158	137/137	226/226	125/125	146/146	107/107	191/191	130/130	129/129	141/141	216/216	157/157	168/168	200/200	209/209	162/162	109/109	160/160
NR16	182/182	192/192	158/158	137/137	226/226	125/125	146/146	107/107	191/191	130/130	129/129	141/141	216/216	157/157	168/168	200/200	209/209	162/162	109/109	160/160
NR5	182/182	192/192	158/158	137/137	226/226	125/125	146/146	107/107	191/191	130/130	129/129	141/141	216/216	157/157	168/168	200/200	209/209	162/162	109/109	160/160
NR6	182/182	192/192	158/158	137/137	226/226	125/125	146/146	107/107	191/191	130/130	129/129	141/141	216/216	157/157	168/168	200/200	209/209	162/162	109/109	160/160
NR7	182/182	192/192	158/158	137/137	226/226	125/125	146/146	107/107	191/191	130/130	129/129	141/141	216/216	157/157	168/168	200/200	209/209	162/162	109/109	160/160
P17	182/182	192/192	158/158	137/137	226/226	125/125	146/146	107/107	191/191	130/130	129/129	141/141	216/216	157/157	168/168	200/200	209/209	162/162	109/109	160/160
P6	182/182	192/192	158/158	137/137	226/226	125/125	146/146	107/107	191/191	130/130	129/129	141/141	216/216	157/157	168/168	200/200	209/209	162/162	109/109	160/160
P8	182/182	192/192	158/158	137/137	226/226	125/125	146/146	107/107	191/191	130/130	129/129	141/141	216/216	157/157	168/168	200/200	209/209	162/162	109/109	160/160
P5	182/182	192/192	158/158	137/137	226/226	125/125	146/146	107/107	191/191	130/130	129/129	141/141	216/216	157/157	168/168	200/200	209/209	162/162	109/109	160/160
P13	182/182	192/192	158/158	137/137	226/226	125/125	146/146	107/107	191/191	130/130	129/129	141/141	216/216	157/157	168/168	200/200	209/209	162/162	109/109	160/160
P14	182/182	192/192	158/158	137/137	226/226	125/125	146/146	107/107	193/193	130/130	129/129	141/141	216/216	157/157	168/168	200/200	209/209	162/162	109/109	160/160
P11	182/182	192/192	158/158	137/137	226/226	125/125	146/146	107/107	193/193	130/130	129/129	141/141	216/216	157/157	168/168	200/200	209/209	162/162	109/109	160/160
P15	182/182	192/192	158/158	137/137	226/226	125/125	146/146	107/107	193/193	130/130	129/129	141/141	216/216	157/157	168/168	200/200	209/209	162/162	109/109	160/160
P12	182/182	192/192	158/158	137/137	226/226	125/125	146/146	107/107	193/193	130/130	129/129	141/141	216/216	157/157	168/168	200/200	209/209	162/162	109/109	160/160
P18	182/182	192/192	158/158	137/137	226/226	125/125	146/146	113/113	191/191	130/130	129/129	141/141	216/216	157/157	168/168	200/200	209/209	162/162	109/109	160/160
P19	182/182	192/192	158/158	137/137	226/226	125/125	146/146	113/113	191/191	130/130	129/129	141/141	216/216	157/157	168/168	200/200	209/209	162/162	109/109	160/160
P20	182/182	192/192	158/158	137/137	226/226	125/125	146/146	113/113	191/191	130/130	129/129	141/141	216/216	157/157	168/168	200/200	209/209	162/162	109/109	160/160
P3	182/182	192/192	158/158	137/137	226/226	125/125	146/146	113/113	191/191	130/130	129/129	141/141	216/216	157/157	168/168	200/200	209/209	162/162	109/109	160/160
P4	182/182	192/192	158/158	137/137	226/226	125/125	146/146	113/113	191/191	130/130	129/129	141/141	216/216	157/157	168/168	200/200	209/209	162/162	109/109	160/160
P7	182/182	192/192	158/158	137/137	226/226	125/125	146/146	113/113	191/191	130/130	129/129	141/141	216/216	157/157	168/168	200/200	209/209	162/162	109/109	160/160
P9	182/182	192/192	158/158	137/137	226/226	125/125	146/146	113/113	191/191	130/130	129/129	141/141	216/216	157/157	168/168	200/200	209/209	162/162	109/109	160/160
P16	182/182	192/192	158/158	137/137	226/226	125/125	146/146	113/113	191/191	130/130	129/129	141/141	216/216	157/157	168/168	200/200	209/209	162/162	109/109	160/160
P2	182/182	192/192	158/158	137/137	226/226	125/125	146/146	107113	191/191	130/130	129/129	141/141	216/216	157/157	168/168	200/200	209/209	162/162	109/109	160/160
P10	182/182	192/192	158/158	137/137	226/226	125/125	146/146	113/113	191/191	130/130	129/129	141/141	216/216	157/157	168/168	200/200	209/209	162/162	109/109	160/160
P1	182/182	192/192	158/158	137/137	226/226	125/125	146/146	113/113	193/193	130/130	129/129	141/141	216/216	157/157	168/168	200/200	209/209	160/160	109/109	160/160
RB84	182/182	192/192	158/158	137/137	226/226	125/125	146/146	107/107	191/191	130/130	129/129	141/141	216/216	157/157	168/168	200/200	209/209	160/160	106/106	157/157
RB2	182/182	192/192	158/158	137/137	226/226	125/125	146/146	107/107	191/191	130/130	129/129	141/141	216/216	157/157	168/168	200/200	209/209	160/160	106/106	157/157
RB3	182/182	192/192	158/158	137/137	226/226	125/125	146/146	107/107	191/191	130/130	129/129	141/141	216/216	157/157	168/168	200/200	209/209	160/160	106/106	157/157
RB4	182/182	192/192	158/158	137/137	226/226	125/125	146/146	107/107	191/191	130/130	129/129	141/141	216/216	157/157	168/168	200/200	209/209	160/160	106/106	157/157
RB6	182/182	192/192	158/158	137/137	226/226	125/125	146/146	107/107	191/191	130/130	129/129	141/141	216/216	157/157	168/168	200/200	209/209	162/162	109/109	160/160
RB5	182/182	192/192	158/158	137/137	226/226	125/125	146/146	107/107	191/191	130/130	129/129	141/141	216/216	157/157	168/168	200/200	209/209	162/162	109/109	160/160
